# Supplementary material for: NanoString-based breast cancer risk prediction for women with sclerosing adenosis
Source: Springer Nature journal article supplement (doi:10.1007/s10549-017-4441-z), 2017-08-10
Supplement: MOESM1 [file 13940890]

**Supplemental Table 1. DASL NanoString correlations**

| <b>DASL probe ID</b> | <b>Nanostrong<br/>Gene ID</b> | <b>Correlation<sup>1</sup></b> | <b>P-value</b> | <b>P&lt;0.05</b> | <b>P&lt;0.0006</b> |
|----------------------|-------------------------------|--------------------------------|----------------|------------------|--------------------|
| ILMN_1656593         | AK5                           | 0.480                          | 8.00E-10       | 1                | 1                  |
| ILMN_2283473         | AK5                           | 0.280                          | 5.40E-04       | 1                | 1                  |
| ILMN_2387712         | AK5                           | 0.660                          | 2.70E-19       | 1                | 1                  |
| ILMN_1721391         | ATP6V0B                       | 0.330                          | 5.20E-05       | 1                | 1                  |
| ILMN_2353642         | ATP6V0B                       | 0.180                          | 2.90E-02       | 1                | 0                  |
| ILMN_1674670         | BTBD11                        | -0.300                         | 2.30E-04       | 1                | 1                  |
| ILMN_1696582         | BTBD11                        | -0.056                         | 5.00E-01       | 0                | 0                  |
| ILMN_1705066         | BTBD11                        | 0.130                          | 1.10E-01       | 0                | 0                  |
| ILMN_1812262         | DDR1                          | 0.099                          | 2.30E-01       | 0                | 0                  |
| ILMN_2360054         | DDR1                          | -0.240                         | 4.00E-03       | 1                | 0                  |
| ILMN_2290547         | DDR1                          | 0.031                          | 7.10E-01       | 0                | 0                  |
| ILMN_1662010         | DLK2                          | -0.180                         | 2.70E-02       | 1                | 0                  |
| ILMN_1676728         | DLK2                          | 0.180                          | 3.10E-02       | 1                | 0                  |
| ILMN_1702943         | DLK2                          | 0.088                          | 2.90E-01       | 0                | 0                  |
| ILMN_1743199         | EGR2                          | 0.056                          | 5.00E-01       | 0                | 0                  |
| ILMN_1667686         | EXOC6                         | -0.400                         | 8.80E-07       | 1                | 1                  |
| ILMN_1651628         | EXOC6                         | -0.300                         | 2.90E-04       | 1                | 1                  |
| ILMN_1679687         | EXOC6                         | 0.076                          | 3.60E-01       | 0                | 0                  |
| ILMN_1732182         | FBXO44                        | 0.210                          | 9.60E-03       | 1                | 0                  |
| ILMN_2325625         | FBXO44                        | 0.120                          | 1.40E-01       | 0                | 0                  |
| ILMN_1651597         | FBXO44                        | 0.100                          | 2.20E-01       | 0                | 0                  |
| ILMN_2344002         | GEMIN2                        | 0.300                          | 2.80E-04       | 1                | 1                  |
| ILMN_2344007         | GEMIN2                        | 0.190                          | 2.00E-02       | 1                | 0                  |
| ILMN_1659990         | HILPDA                        | -0.130                         | 1.10E-01       | 0                | 0                  |
| ILMN_1693560         | HMGA1                         | 0.430                          | 8.30E-08       | 1                | 1                  |
| ILMN_1742699         | HMGA1                         | 0.420                          | 2.60E-07       | 1                | 1                  |
| ILMN_2311537         | HMGA1                         | 0.070                          | 4.10E-01       | 0                | 0                  |
| ILMN_2359287         | ITGA6                         | -0.180                         | 2.90E-02       | 1                | 0                  |
| ILMN_2267488         | ITGA6                         | 0.450                          | 1.60E-08       | 1                | 1                  |
| ILMN_1798373         | ITPRIPL1                      | 0.170                          | 3.80E-02       | 1                | 0                  |
| ILMN_1788240         | ITPRIPL1                      | 0.048                          | 5.70E-01       | 0                | 0                  |
| ILMN_1772383         | ITPRIPL1                      | -0.089                         | 2.90E-01       | 0                | 0                  |
| ILMN_1809708         | KCTD21                        | 0.090                          | 2.80E-01       | 0                | 0                  |
| ILMN_1790160         | KIT                           | 0.640                          | 0.00E+00       | 1                | 1                  |
| ILMN_2229379         | KIT                           | 0.430                          | 1.00E-07       | 1                | 1                  |
| ILMN_1752810         | LARP6                         | 0.180                          | 2.60E-02       | 1                | 0                  |
| ILMN_1663401         | LARP6                         | 0.360                          | 7.00E-06       | 1                | 1                  |
| ILMN_1770479         | LMO7                          | 0.290                          | 4.50E-04       | 1                | 1                  |
| ILMN_2297196         | LRRC4B                        | 0.300                          | 2.00E-04       | 1                | 1                  |
| ILMN_1768510         | MAN2B2                        | 0.170                          | 4.70E-02       | 1                | 0                  |
| ILMN_1774739         | MMP14                         | -0.290                         | 5.30E-04       | 1                | 1                  |
| ILMN_1801146         | MMP17                         | 0.064                          | 4.50E-01       | 0                | 0                  |
| ILMN_1674706         | MTHFD2                        | 0.420                          | 1.80E-07       | 1                | 1                  |
| ILMN_2293322         | MTHFD2                        | -0.200                         | 1.70E-02       | 1                | 0                  |
| ILMN_2405521         | MTHFD2                        | 0.410                          | 5.50E-07       | 1                | 1                  |
| ILMN_1788268         | NAPG                          | -0.290                         | 3.80E-04       | 1                | 1                  |
| ILMN_1738229         | NDRG3                         | -0.170                         | 3.90E-02       | 1                | 0                  |
| ILMN_2385097         | NDRG3                         | -0.300                         | 3.00E-04       | 1                | 1                  |

|              |         |        |          |   |   |
|--------------|---------|--------|----------|---|---|
| ILMN_1682503 | NPFF    | -0.062 | 4.60E-01 | 0 | 0 |
| ILMN_1735762 | NPNT    | -0.028 | 7.40E-01 | 0 | 0 |
| ILMN_1780132 | PELI2   | 0.380  | 2.70E-06 | 1 | 1 |
| ILMN_1789176 | PSMB1   | -0.310 | 1.60E-04 | 1 | 1 |
| ILMN_2359789 | RAC1    | -0.072 | 3.90E-01 | 0 | 0 |
| ILMN_1652445 | RAC1    | -0.200 | 1.50E-02 | 1 | 0 |
| ILMN_3251085 | RBBP4   | 0.420  | 2.30E-07 | 1 | 1 |
| ILMN_2062524 | RBBP4   | 0.340  | 3.20E-05 | 1 | 1 |
| ILMN_1751141 | RGS12   | 0.230  | 4.90E-03 | 1 | 0 |
| ILMN_1722834 | RGS12   | 0.640  | 3.70E-18 | 1 | 1 |
| ILMN_2384629 | RGS12   | -0.110 | 1.80E-01 | 0 | 0 |
| ILMN_1691843 | RNPS1   | -0.410 | 3.90E-07 | 1 | 1 |
| ILMN_2375386 | RNPS1   | -0.310 | 1.30E-04 | 1 | 1 |
| ILMN_1685661 | RRP15   | 0.260  | 1.60E-03 | 1 | 0 |
| ILMN_1778294 | SENP7   | 0.390  | 1.70E-06 | 1 | 1 |
| ILMN_2382354 | SENP7   | 0.420  | 2.20E-07 | 1 | 1 |
| ILMN_2102069 | SLC16A4 | 0.290  | 3.80E-04 | 1 | 1 |
| ILMN_1804673 | SLC16A4 | 0.460  | 7.50E-09 | 1 | 1 |
| ILMN_1693183 | SORBS2  | 0.089  | 2.90E-01 | 0 | 0 |
| ILMN_1716407 | SORBS2  | 0.530  | 0.00E+00 | 1 | 1 |
| ILMN_2407879 | SORBS2  | 0.480  | 1.20E-09 | 1 | 1 |
| ILMN_1674098 | SORBS2  | -0.130 | 1.20E-01 | 0 | 0 |
| ILMN_1726805 | STX2    | -0.200 | 1.50E-02 | 1 | 0 |
| ILMN_1747775 | STX2    | 0.170  | 4.00E-02 | 1 | 0 |
| ILMN_2344216 | STX2    | 0.450  | 2.90E-08 | 1 | 1 |
| ILMN_1726928 | TCEA3   | 0.570  | 9.50E-14 | 1 | 1 |
| ILMN_1754102 | TGIF1   | 0.130  | 1.30E-01 | 0 | 0 |
| ILMN_2247842 | TGIF1   | -0.013 | 8.80E-01 | 0 | 0 |
| ILMN_2318643 | TGIF1   | 0.310  | 1.40E-04 | 1 | 1 |
| ILMN_1702211 | TGIF1   | 0.043  | 6.10E-01 | 0 | 0 |
| ILMN_2318638 | TGIF1   | 0.680  | 0.00E+00 | 1 | 1 |
| ILMN_2245292 | TGIF1   | -0.210 | 1.00E-02 | 1 | 0 |
| ILMN_1656761 | TGIF1   | -0.470 | 3.40E-09 | 1 | 1 |
| ILMN_1724096 | TNK1    | 0.320  | 1.10E-04 | 1 | 1 |
| ILMN_1726873 | TPCN2   | 0.065  | 4.40E-01 | 0 | 0 |
| ILMN_1745079 | TRIM2   | 0.079  | 3.50E-01 | 0 | 0 |
| ILMN_2058975 | UFL1    | -0.110 | 1.80E-01 | 0 | 0 |
| ILMN_1691188 | UIMC1   | 0.009  | 9.20E-01 | 0 | 0 |
| ILMN_2311826 | USP6NL  | 0.075  | 3.70E-01 | 0 | 0 |
| ILMN_1659696 | USP6NL  | 0.150  | 7.00E-02 | 1 | 0 |
| ILMN_1681846 | ZNF540  | 0.400  | 6.50E-07 | 1 | 1 |

<sup>1</sup>Spearman's rank correlation coefficients (rho).

<sup>2</sup>Indicator if p-value is less than the uncorrected threshold.

<sup>3</sup>Indicator if p-value is less than the Bonferroni corrected threshold for 46 probes.

**Supplemental Table 2. Univariate associations of gene expression values by breast cancer status at 10 years.**

| <b>Gene</b> | <b>Mean Expression Cases</b> | <b>Mean Expression Controls</b> | <b>Wilcoxon P-value</b> | <b>OR</b> | <b>Age-adjusted OR</b> | <b>In SATTTC10?</b> |
|-------------|------------------------------|---------------------------------|-------------------------|-----------|------------------------|---------------------|
| AK5         | 7.843                        | 7.252                           | 0.008                   | 1.714     | 1.426                  | Yes                 |
| ATP6V0B     | 8.534                        | 8.581                           | 0.578                   | 0.867     | 0.707                  | Yes                 |
| BTBD11      | 4.795                        | 4.453                           | 0.119                   | 1.674     | 1.749                  | No                  |
| DDR1        | 7.840                        | 7.613                           | 0.013                   | 2.941     | 2.220                  | No                  |
| DLK2        | 5.367                        | 4.831                           | 0.002                   | 2.331     | 2.136                  | No                  |
| EGR2        | 6.393                        | 6.310                           | 0.895                   | 1.074     | 1.211                  | No                  |
| EXOC6       | 5.554                        | 5.121                           | 0.001                   | 1.675     | 1.565                  | Yes                 |
| FBXO44      | 7.715                        | 7.585                           | 0.235                   | 1.653     | 1.265                  | No                  |
| GEMIN2      | 4.956                        | 4.821                           | 0.504                   | 1.125     | 1.064                  | Yes                 |
| HILPDA      | 6.735                        | 6.635                           | 0.427                   | 1.158     | 1.037                  | Yes                 |
| HMGA1       | 8.111                        | 8.111                           | 0.526                   | 1.000     | 0.992                  | No                  |
| ITGA6       | 7.969                        | 7.755                           | 0.015                   | 3.616     | 3.854                  | No                  |
| ITPRIPL1    | 4.357                        | 3.962                           | 0.091                   | 1.584     | 1.449                  | Yes                 |
| KCTD21      | 5.854                        | 5.567                           | 0.098                   | 1.684     | 1.269                  | Yes                 |
| KIT         | 7.564                        | 6.968                           | 0.001                   | 2.261     | 2.278                  | No                  |
| LARP6       | 5.598                        | 5.204                           | 0.188                   | 1.503     | 1.426                  | Yes                 |
| LMO7        | 7.084                        | 6.984                           | 0.648                   | 1.266     | 1.265                  | No                  |
| LRRC4B      | 3.905                        | 4.460                           | 0.006                   | 0.621     | 0.618                  | Yes                 |
| MAN2B2      | 7.520                        | 7.447                           | 0.546                   | 1.334     | 0.975                  | Yes                 |
| MMP14       | 7.568                        | 7.258                           | 0.201                   | 1.360     | 1.515                  | No                  |
| MMP17       | 5.074                        | 5.061                           | 0.314                   | 1.019     | 0.918                  | No                  |
| MTHFD2      | 6.858                        | 6.629                           | 0.358                   | 1.335     | 1.256                  | Yes                 |
| NAPG        | 6.064                        | 5.799                           | 0.117                   | 1.474     | 1.354                  | Yes                 |
| NDRG3       | 7.171                        | 7.086                           | 0.817                   | 1.296     | 1.283                  | Yes                 |
| NPFF        | 5.379                        | 5.518                           | 0.168                   | 0.721     | 0.706                  | Yes                 |
| NPNT        | 6.643                        | 6.221                           | 0.103                   | 1.402     | 1.208                  | Yes                 |
| PELI2       | 5.455                        | 5.264                           | 0.626                   | 1.207     | 1.327                  | Yes                 |
| PSMB1       | 6.881                        | 6.458                           | 0.026                   | 1.797     | 1.528                  | Yes                 |
| RAC1        | 9.108                        | 9.043                           | 0.810                   | 1.250     | 0.966                  | No                  |
| RBBP4       | 7.132                        | 6.867                           | 0.137                   | 1.744     | 1.635                  | No                  |
| RGS12       | 5.376                        | 4.966                           | 0.011                   | 2.273     | 2.085                  | Yes                 |
| RNPS1       | 8.644                        | 8.497                           | 0.073                   | 2.314     | 1.717                  | Yes                 |
| RRP15       | 5.429                        | 5.144                           | 0.189                   | 1.748     | 1.807                  | Yes                 |
| SEN7        | 7.685                        | 7.474                           | 0.271                   | 1.486     | 1.433                  | No                  |
| SLC16A4     | 5.156                        | 4.847                           | 0.173                   | 1.549     | 1.359                  | Yes                 |
| SORBS2      | 7.816                        | 7.391                           | 0.002                   | 3.130     | 2.409                  | Yes                 |
| STX2        | 6.129                        | 6.161                           | 0.310                   | 0.964     | 0.875                  | No                  |
| TCEA3       | 7.221                        | 6.868                           | 0.106                   | 1.610     | 1.321                  | Yes                 |
| TGIF1       | 7.863                        | 7.629                           | 0.049                   | 1.979     | 1.726                  | Yes                 |
| TNK1        | 6.210                        | 5.947                           | 0.060                   | 1.777     | 1.395                  | No                  |
| TPCN2       | 7.167                        | 7.028                           | 0.437                   | 1.410     | 1.290                  | Yes                 |
| TRIM2       | 5.756                        | 5.897                           | 0.273                   | 0.695     | 0.605                  | No                  |
| UFL1        | 8.627                        | 8.640                           | 0.741                   | 0.871     | 0.846                  | Yes                 |
| UIMC1       | 6.888                        | 6.955                           | 0.163                   | 0.822     | 0.683                  | No                  |
| USP6NL      | 7.483                        | 7.434                           | 0.981                   | 1.240     | 1.134                  | No                  |
| ZNF540      | 5.598                        | 5.368                           | 0.443                   | 1.312     | 1.138                  | Yes                 |

Mean Expression Cases, mean of gene expression across case samples; Mean Expression Controls, mean of gene expression across control samples; Wilcoxon P-value, p-value from a Wilcoxon Rank Sum Test comparing mean gene expression in cases vs. controls; OR, odds ratio from a logistic regression model predicting case-control status; age-adjusted OR, odds ratio from a logistic regression model adjusting for age; In SA-TTC10, indicator of whether the probe was part of the previously derived SA-TTC10 model or selected based on biological insight.

**Supplemental Table 3.** ROC AUC values from the 5-fold cross-validation using the genes in the SATTC10 gene set

| <b>Training</b> |          |                |                      |                 |                                |                   |                                  |
|-----------------|----------|----------------|----------------------|-----------------|--------------------------------|-------------------|----------------------------------|
| fold            | # probes | cases:controls | Gene expression only | Gail model only | Gene expression and Gail model | BBD-BC model only | Gene expression and BBD-BC model |
| 1               | 27       | 29:92          | 0.67                 | 0.57            | 0.68                           | 0.67              | 0.70                             |
| 2               | 27       | 29:91          | 0.65                 | 0.52            | 0.65                           | 0.62              | 0.66                             |
| 3               | 27       | 30:91          | 0.67                 | 0.60            | 0.68                           | 0.69              | 0.70                             |
| 4               | 27       | 30:91          | 0.71                 | 0.57            | 0.71                           | 0.63              | 0.72                             |
| 5               | 27       | 30:91          | 0.72                 | 0.59            | 0.72                           | 0.67              | 0.73                             |
|                 |          | <b>average</b> | <b>0.69</b>          | <b>0.57</b>     | <b>0.69</b>                    | <b>0.65</b>       | <b>0.70</b>                      |

  

| <b>Validation</b> |          |                |                      |                 |                                |                   |                                  |
|-------------------|----------|----------------|----------------------|-----------------|--------------------------------|-------------------|----------------------------------|
| fold              | # probes | cases:controls | Gene expression only | Gail model only | Gene expression and Gail model | BBD-BC model only | Gene expression and BBD-BC model |
| 1                 | 27       | 8:22           | 0.74                 | 0.57            | 0.74                           | 0.60              | 0.76                             |
| 2                 | 27       | 8:23           | 0.86                 | 0.82            | 0.86                           | 0.81              | 0.88                             |
| 3                 | 27       | 7:23           | 0.79                 | 0.42            | 0.77                           | 0.54              | 0.76                             |
| 4                 | 27       | 7:23           | 0.53                 | 0.60            | 0.54                           | 0.76              | 0.56                             |
| 5                 | 27       | 7:23           | 0.39                 | 0.45            | 0.39                           | 0.57              | 0.40                             |
|                   |          | <b>average</b> | <b>0.66</b>          | <b>0.57</b>     | <b>0.66</b>                    | <b>0.66</b>       | <b>0.67</b>                      |

Genes expression only, model contains only the selected probes; Gail model only, model includes only the the BCRAT (Gail) Model predicted risk, Gene expression and Gail model, model includes selected probes plus the BCRAT model predicted risk; BBD-BC model only, model includes only the BBD-BC model predicted risk; Gene expression and BBD-BC model, models includes selected probes plus the BBD-BC model predicted risk.

**Supplemental Table 4.** ROC AUC values from the 5-fold cross-validation using all genes in the Nanostring codeset

| <b>Training</b> |                 |                        |                             |                        |                                       |                          |                                         |
|-----------------|-----------------|------------------------|-----------------------------|------------------------|---------------------------------------|--------------------------|-----------------------------------------|
| <b>fold</b>     | <b># probes</b> | <b>cases: controls</b> | <b>Gene expression only</b> | <b>Gail model only</b> | <b>Gene expression and Gail model</b> | <b>BBD-BC model only</b> | <b>Gene expression and BBD-BC model</b> |
| 1               | 46              | 29:92                  | 0.76                        | 0.56                   | 0.76                                  | 0.67                     | 0.76                                    |
| 2               | 46              | 29:91                  | 0.68                        | 0.59                   | 0.69                                  | 0.69                     | 0.70                                    |
| 3               | 46              | 30:91                  | 0.73                        | 0.61                   | 0.73                                  | 0.66                     | 0.73                                    |
| 4               | 46              | 30:91                  | 0.73                        | 0.52                   | 0.73                                  | 0.60                     | 0.73                                    |
| 5               | 46              | 30:91                  | 0.72                        | 0.59                   | 0.71                                  | 0.67                     | 0.72                                    |
|                 |                 | <b>average</b>         | <b>0.72</b>                 | <b>0.57</b>            | <b>0.72</b>                           | <b>0.66</b>              | <b>0.73</b>                             |

  

| <b>Validation</b> |                 |                        |                             |                        |                                       |                          |                                         |
|-------------------|-----------------|------------------------|-----------------------------|------------------------|---------------------------------------|--------------------------|-----------------------------------------|
| <b>fold</b>       | <b># probes</b> | <b>cases: controls</b> | <b>Gene expression only</b> | <b>Gail model only</b> | <b>Gene expression and Gail model</b> | <b>BBD-BC model only</b> | <b>Gene expression and BBD-BC model</b> |
| 1                 | 46              | 8:22                   | 0.59                        | 0.63                   | 0.59                                  | 0.64                     | 0.60                                    |
| 2                 | 46              | 8:23                   | 0.92                        | 0.54                   | 0.89                                  | 0.53                     | 0.90                                    |
| 3                 | 46              | 7:23                   | 0.53                        | 0.42                   | 0.55                                  | 0.69                     | 0.57                                    |
| 4                 | 46              | 7:23                   | 0.69                        | 0.76                   | 0.69                                  | 0.86                     | 0.70                                    |
| 5                 | 46              | 7:23                   | 0.77                        | 0.49                   | 0.77                                  | 0.61                     | 0.77                                    |
|                   |                 | <b>average</b>         | <b>0.70</b>                 | <b>0.57</b>            | <b>0.70</b>                           | <b>0.66</b>              | <b>0.71</b>                             |

Gene expression only, model contains only the selected probes; Gail model only, model includes only the BCRAT (Gail) Model predicted risk; Gene expression and Gail model, model includes selected probes plus the BCRAT model predicted risk; BBD-BC model only, model includes only the BBD-BC model predicted risk; Gene expression and BBD-BC model, models includes selected probes plus the BBD-BC model predicted risk.

Supplemental Table 5. Sensitivity analysis models without atypia samples.

| Training |          |                |                      |                 |                                |                   |                                  |
|----------|----------|----------------|----------------------|-----------------|--------------------------------|-------------------|----------------------------------|
| fold     | # probes | cases:controls | Gene expression only | Gail model only | Gene expression and Gail model | BBD-BC model only | Gene expression and BBD-BC model |
| 1        | 46       | 26:81          | 0.71                 | 0.53            | 0.71                           | 0.63              | 0.72                             |
| 2        | 46       | 26:81          | 0.78                 | 0.53            | 0.78                           | 0.60              | 0.78                             |
| 3        | 46       | 26:81          | 0.75                 | 0.55            | 0.75                           | 0.62              | 0.75                             |
| 4        | 46       | 26:81          | 0.72                 | 0.54            | 0.72                           | 0.60              | 0.73                             |
| 5        | 46       | 26:81          | 0.75                 | 0.49            | 0.75                           | 0.61              | 0.75                             |
|          |          | <b>average</b> | <b>0.74</b>          | <b>0.53</b>     | <b>0.74</b>                    | <b>0.61</b>       | <b>0.74</b>                      |

  

| Validation |          |                |                      |                 |                                |                   |                                  |
|------------|----------|----------------|----------------------|-----------------|--------------------------------|-------------------|----------------------------------|
| fold       | # probes | cases:controls | Gene expression only | Gail model only | Gene expression and Gail model | BBD-BC model only | Gene expression and BBD-BC model |
| 1          | 46       | 6:20           | 0.82                 | 0.51            | 0.82                           | 0.52              | 0.82                             |
| 2          | 46       | 6:20           | 0.66                 | 0.55            | 0.66                           | 0.68              | 0.66                             |
| 3          | 46       | 5:20           | 0.62                 | 0.49            | 0.58                           | 0.60              | 0.58                             |
| 4          | 46       | 5:20           | 0.55                 | 0.46            | 0.55                           | 0.71              | 0.54                             |
| 5          | 46       | 5:21           | 0.71                 | 0.64            | 0.72                           | 0.59              | 0.69                             |
|            |          | <b>average</b> | <b>0.67</b>          | <b>0.53</b>     | <b>0.67</b>                    | <b>0.62</b>       | <b>0.66</b>                      |

Genes expression only, model contains only the selected probes; Gail model only, model includes only the BCRAT (Gail) Model predicted risk, Gene expression and Gail model, model includes selected probes plus the BCRAT model predicted risk; BBD-BC model only, model includes only the BBD-BC model predicted risk; Gene expression and BBD-BC model, models includes selected probes plus the BBD-BC model predicted risk.

**Supplemental Table 6. ROC AUC values from the 5-fold cross-validation using the five genes present in all models**

| <b>Training</b> |          |                |                      |                 |                                |                   |                                  |
|-----------------|----------|----------------|----------------------|-----------------|--------------------------------|-------------------|----------------------------------|
| fold            | # probes | cases:controls | Gene expression only | Gail model only | Gene expression and Gail model | BBD-BC model only | Gene expression and BBD-BC model |
| 1               | 5        | 29:91          | 0.78                 | 0.61            | 0.79                           | 0.70              | 0.82                             |
| 2               | 5        | 29:91          | 0.76                 | 0.54            | 0.76                           | 0.65              | 0.79                             |
| 3               | 5        | 30:90          | 0.77                 | 0.58            | 0.78                           | 0.67              | 0.80                             |
| 4               | 5        | 30:90          | 0.77                 | 0.60            | 0.78                           | 0.67              | 0.79                             |
| 5               | 5        | 30:90          | 0.74                 | 0.53            | 0.74                           | 0.59              | 0.76                             |
| <b>average</b>  |          |                | <b>0.77</b>          | <b>0.57</b>     | <b>0.77</b>                    | <b>0.65</b>       | <b>0.79</b>                      |

  

| <b>Validation</b> |          |                |                      |                 |                                |                   |                                  |
|-------------------|----------|----------------|----------------------|-----------------|--------------------------------|-------------------|----------------------------------|
| fold              | # probes | cases:controls | Gene expression only | Gail model only | Gene expression and Gail model | BBD-BC model only | Gene expression and BBD-BC model |
| 1                 | 5        | 8:22           | 0.69                 | 0.39            | 0.66                           | 0.53              | 0.66                             |
| 2                 | 5        | 8:22           | 0.73                 | 0.66            | 0.75                           | 0.67              | 0.77                             |
| 3                 | 5        | 7:23           | 0.73                 | 0.58            | 0.75                           | 0.60              | 0.75                             |
| 4                 | 5        | 7:23           | 0.75                 | 0.47            | 0.75                           | 0.61              | 0.80                             |
| 5                 | 5        | 7:23           | 0.88                 | 0.75            | 0.88                           | 0.91              | 0.93                             |
| <b>average</b>    |          |                | <b>0.75</b>          | <b>0.57</b>     | <b>0.76</b>                    | <b>0.67</b>       | <b>0.78</b>                      |

Genes expression only, model contains only the selected probes; Gail model only, model includes only the BCRAT (Gail) Model predicted risk, Gene expression and Gail model, model includes selected probes plus the BCRAT model predicted risk; BBD-BC model only, model includes only the BBD-BC model predicted risk; Gene expression and BBD-BC model, models includes selected probes plus the BBD-BC model predicted risk.
